# Supplementary material
Source: PubMed Central journal article supplement (PMC5892430)
Supplement: NIHMS955548-supplement-Supplemental_file.pdf [file NIHMS955548-supplement-Supplemental_file.pdf]

## Supplemental Information

**SUPPLEMENTAL TABLE 2** Summary of Search Terms Used in the PubMed Online Database To Identify Articles Reporting on the Association Between Adverse Childhood Experiences and Cancer Risk in Adulthood

|                                                |                                                                                                                                                                                                                                                                                                                                                                                                                                                                                                                                                                                                                                                                                                                                                                                                                                                                                                                                                                                                                                                                                               |
|------------------------------------------------|-----------------------------------------------------------------------------------------------------------------------------------------------------------------------------------------------------------------------------------------------------------------------------------------------------------------------------------------------------------------------------------------------------------------------------------------------------------------------------------------------------------------------------------------------------------------------------------------------------------------------------------------------------------------------------------------------------------------------------------------------------------------------------------------------------------------------------------------------------------------------------------------------------------------------------------------------------------------------------------------------------------------------------------------------------------------------------------------------|
| Terms related to adverse childhood experiences | [(ACE) OR (ACEs) OR (“adverse childhood experiences”) OR (“adverse childhood events”) OR (“childhood maltreatment”) OR (“child maltreatment”) OR (“childhood adversity”) OR (“child adversity”) OR (“childhood adversities”) OR (“child adversities”) OR (“early adversity”) OR (“early adversities”) OR (“childhood physical abuse”) OR (“child physical abuse”) OR (“physical abuse”) OR (“childhood sexual abuse”) OR (“child sexual abuse”) OR (“sexual abuse”) OR (“childhood neglect”) OR (“child neglect”) OR (“childhood physical neglect”) OR (“child physical neglect”) OR (“physical neglect”) OR (“child abuse”) OR (“childhood abuse”) OR (“child emotional abuse”) OR (“childhood emotional abuse”) OR (“emotional abuse”) OR (“child emotional neglect”) OR (“childhood emotional neglect”) OR (“child trauma”) OR (“childhood trauma”) OR (“emotional neglect”) OR (“parental incapacities”) OR (“family incapacities”) OR (“adverse family experiences”) OR (“adverse family events”)]                                                                                       |
| AND                                            |                                                                                                                                                                                                                                                                                                                                                                                                                                                                                                                                                                                                                                                                                                                                                                                                                                                                                                                                                                                                                                                                                               |
| Terms related to cancer incidence              | [(astrocytoma) OR (astrocytomas) OR (blastoma) OR (blastomas) OR (brain tumors) OR (cancer) OR (cancers) OR (carcinoma) OR (carcinomas) OR (craniopharyngioma) OR (craniopharyngiomas) OR (ependymoma) OR (ependymomas) OR (histiocytoma) OR (histiocytomas) OR (glioma) OR (gliomas) OR (histiocytosis) OR (leukemia) OR (leukemias) OR (lymphoma) OR (lymphomas) OR (melanoma) OR (melanomas) OR (mesothelioma) OR (mesothelioma) OR (“mycosis fungoides”) OR (“myelodysplastic syndrome”) OR (“myelodysplastic syndromes”) OR (myeloma) OR (myelomas) OR (neoplasm) OR (neoplasms) OR (osteosarcoma) OR (osteosarcomas) OR (papillomatosis) OR (paraganglioma) OR (paragangliomas) OR (pheochromocytoma) OR (pheochromocytomas) OR (sarcoma) OR (sarcomas) OR (retinoblastoma) OR (retinoblastomas) OR (rhabdomyosarcoma) OR (rhabdomyosarcoma) OR (“sezary syndrome”) OR (“sezary syndromes”) OR (tumor) OR (tumors) OR (“waldenstrom macroglobulinemia”) OR (“waldenstroms macroglobulinemia”) OR (“waldenstrom’s macroglobulinemia”) OR (wilms) OR (“wilms tumor”) OR (“wilm’s tumor”)] |
| AND                                            |                                                                                                                                                                                                                                                                                                                                                                                                                                                                                                                                                                                                                                                                                                                                                                                                                                                                                                                                                                                                                                                                                               |
| Language selection                             | “english” [language]                                                                                                                                                                                                                                                                                                                                                                                                                                                                                                                                                                                                                                                                                                                                                                                                                                                                                                                                                                                                                                                                          |
| NOT                                            |                                                                                                                                                                                                                                                                                                                                                                                                                                                                                                                                                                                                                                                                                                                                                                                                                                                                                                                                                                                                                                                                                               |
| Excluded search terms                          | [ (“angiotensin-converting enzyme inhibitors”) OR (“ACE inhibitors”) OR (angiotensin) OR (“acute care of the elderly”) OR (ACE-27) OR (“ACE 27”) OR (“adjuvant chemotherapy and endocrine therapy”) OR (“HPV4A ACE”) OR (“ACE serum”) OR (“acute care for the elderly”) OR (“agitation-calmness evaluation scale”) OR (“ACE polymorphism”) OR (“TACE”) OR (“angiotension-converting enzyme”) OR (“central nucleus of the amygdala”) OR (“ACE inhibitor”) OR (“adverse clinical event”) OR (“ACE inhibitor-drug”) OR (“Auto-capillary Electrophoresis”) OR (“alternative cellular energy”) OR (“comment” [publication type]) OR (“meta analysis” [publication type]) OR (“review” [publication type])]                                                                                                                                                                                                                                                                                                                                                                                         |
